# Supplementary material for: Postmenopausal Hormone Therapy and Risk of Stroke: Impact of the Route of Estrogen Administration and Type of Progestogen
Source: PubMed Central journal article supplement — Stroke. 2016 Jun 27;47(7):1734–41. doi: 10.1161/STROKEAHA.116.013052 (PMC4927222; doi:10.1161/strokeaha.116.013052), 2016-06-27
Supplement: str-47-1734-s001.pdf [file str-47-1734-s001.pdf]

ONLINE SUPPLEMENT

SUPPLEMENTAL TABLE I. General characteristics of stroke cases by primary diagnosis

| Characteristics             | I60 (n=1,581) | I61 (n=1,387) | I62 (n=309) | I63 (n=3,640) | I64 (n=497) | p value* |
|-----------------------------|---------------|---------------|-------------|---------------|-------------|----------|
| Age, yrs                    | 55.4 (3.1)    | 56.1 (3.1)    | 55.8 (3.1)  | 56.6 (3.0)    | 56.0 (3.1)  | <0.001   |
| Antidiabetic medication     | 47 (3.0)      | 78 (5.6)      | 22 (7.2)    | 411 (11.3)    | 63 (12.7)   | <0.001   |
| Antihypertensive medication | 343 (21.7)    | 331 (23.9)    | 70 (22.5)   | 1183 (32.5)   | 143 (28.7)  | <0.001   |
| Antidyslipidemia medication | 175 (11.1)    | 150 (10.8)    | 40 (13.0)   | 557 (15.3)    | 85 (17.1)   | <0.001   |

Data expressed as mean (SD) or N (%)

I60: subarachnoid hemorrhage

I61: intracerebral hemorrhage

I62: other nontraumatic intracranial hemorrhage

I63: cerebral infarction

I64: stroke, not specified as hemorrhage or infarction

\* p value derived from ANOVA or Khi-square test

SUPPLEMENTAL Table II. General characteristics of controls by status of hormone therapy use

| Characteristics             | Non-use<br>(n=11331) | Use (n=827) | p value          |
|-----------------------------|----------------------|-------------|------------------|
| Age, yrs                    | 56.6 (2.7)           | 56.5 (2.6)  | 0.54             |
| Antidiabetic medication     | 486 (4.3)            | 11 (1.3)    | <b>&lt;0.001</b> |
| Antihypertensive medication | 2032 (17.9)          | 195 (23.6)  | <b>&lt;0.001</b> |
| Antidyslipidemia medication | 1440 (12.7)          | 111 (13.4)  | 0.56             |
| LTD                         | 134 (1.2)            | 4 (0.5)     | 0.07             |

Data are expressed as means (SD) or number (%)

P values were derived from Khi-square test, Fisher exact test or ANOVA

LTD: Long-term chronic disease

SUPPLEMENTAL Table III. General characteristics of controls by route of estrogen administration

| Characteristics                | Non-use<br>(n=11331) | Oral estrogens<br>use (n=243) | Transdermal estrogens<br>use (n=584) | p value*         | p value# |
|--------------------------------|----------------------|-------------------------------|--------------------------------------|------------------|----------|
| Age, yrs                       | 56.6 (2.7)           | 56.7 (2.5)                    | 56.5 (2.6)                           | 0.33             | 0.15     |
| Antidiabetic<br>medication     | 486 (4.3)            | 3 (1.2)                       | 8 (1.4)                              | <b>&lt;0.001</b> | 0.88     |
| Antihypertensive<br>medication | 2032 (17.9)          | 61 (25.1)                     | 134 (22.9)                           | <b>&lt;0.001</b> | 0.51     |
| Antidyslipidemia<br>medication | 1440 (12.7)          | 37 (15.2)                     | 74 (12.7)                            | 0.51             | 0.33     |
| LTD                            | 134 (1.2)            | 0 (0.0)                       | 4 (0.7)                              | 0.13             | 0.32     |

Data are expressed as means (SD) or number (%)

P values were derived from Khi-square test, Fisher exact test or ANOVA

LTD: Long-term chronic disease

\* p for homogeneity between non-use, oral estrogens use and transdermal estrogens use

# p for homogeneity between oral estrogens use and transdermal estrogens use

SUPPLEMENTAL TABLE IV. General characteristics of controls by type of concomitant progestogens

| Characteristics                | Non-use<br>(n=11331) | No<br>progestogen<br>(n=177) | Progesterone<br>(n=380) | Pregnane<br>derivatives<br>(n=197) | Norpregnane<br>derivatives<br>(n=27) | Nortestosterone<br>derivatives<br>(n=46) | P<br>value*      | P<br>value#  | P<br>value <sup>§</sup> |
|--------------------------------|----------------------|------------------------------|-------------------------|------------------------------------|--------------------------------------|------------------------------------------|------------------|--------------|-------------------------|
| Age, yrs                       | 56.6 (2.7)           | 57.0 (2.5)                   | 56.4 (2.6)              | 56.4 (2.6)                         | 55.5 (2.6)                           | 56.5 (2.3)                               | 0.08             | 0.07         | 0.33                    |
| Antidiabetic<br>medication     | 486 (4.3)            | 4 (2.3)                      | 2 (0.5)                 | 4 (2.0)                            | 1 (3.7)                              | 0 (0.0)                                  | <b>0.002</b>     | 0.24         | 0.17                    |
| Antihypertensive<br>medication | 2032 (17.9)          | 39 (22.0)                    | 78 (20.6)               | 56 (28.4)                          | 14 (51.9)                            | 8 (17.4)                                 | <b>&lt;0.001</b> | <b>0.002</b> | <b>&lt;0.001</b>        |
| Antidyslipidemia<br>medication | 1440 (12.7)          | 35 (19.8)                    | 40 (10.5)               | 26 (13.2)                          | 3 (11.1)                             | 7 (15.2)                                 | 0.08             | 0.06         | 0.68                    |
| LTD                            | 134 (1.2)            | 1 (0.6)                      | 3 (0.8)                 | 0 (0.0)                            | 0 (0.0)                              | 0 (0.0)                                  | 0.51             | 0.77         | 0.68                    |

Data are expressed as means (SD) or number (%)

P values were derived from Khi-square test, Fisher exact test or ANOVA

LTD: Long-term chronic disease

\* p for homogeneity between non-use, no progestogens, progesterone, pregnane derivatives, norpregnane derivatives and nortestosterone derivatives

# p for homogeneity between no progestogens, progesterone, pregnane derivatives, norpregnane derivatives and nortestosterone derivatives

§ p for homogeneity between progesterone, pregnane derivatives, norpregnane derivatives and nortestosterone derivatives
